# Supplementary material
Source: PubMed Central journal article supplement (PMC7333782)
Supplement: NIHMS1559255-supplement-supplemental_Figures.pdf [file NIHMS1559255-supplement-supplemental_Figures.pdf]

## Supplemental Data

Supplemental Figure 1

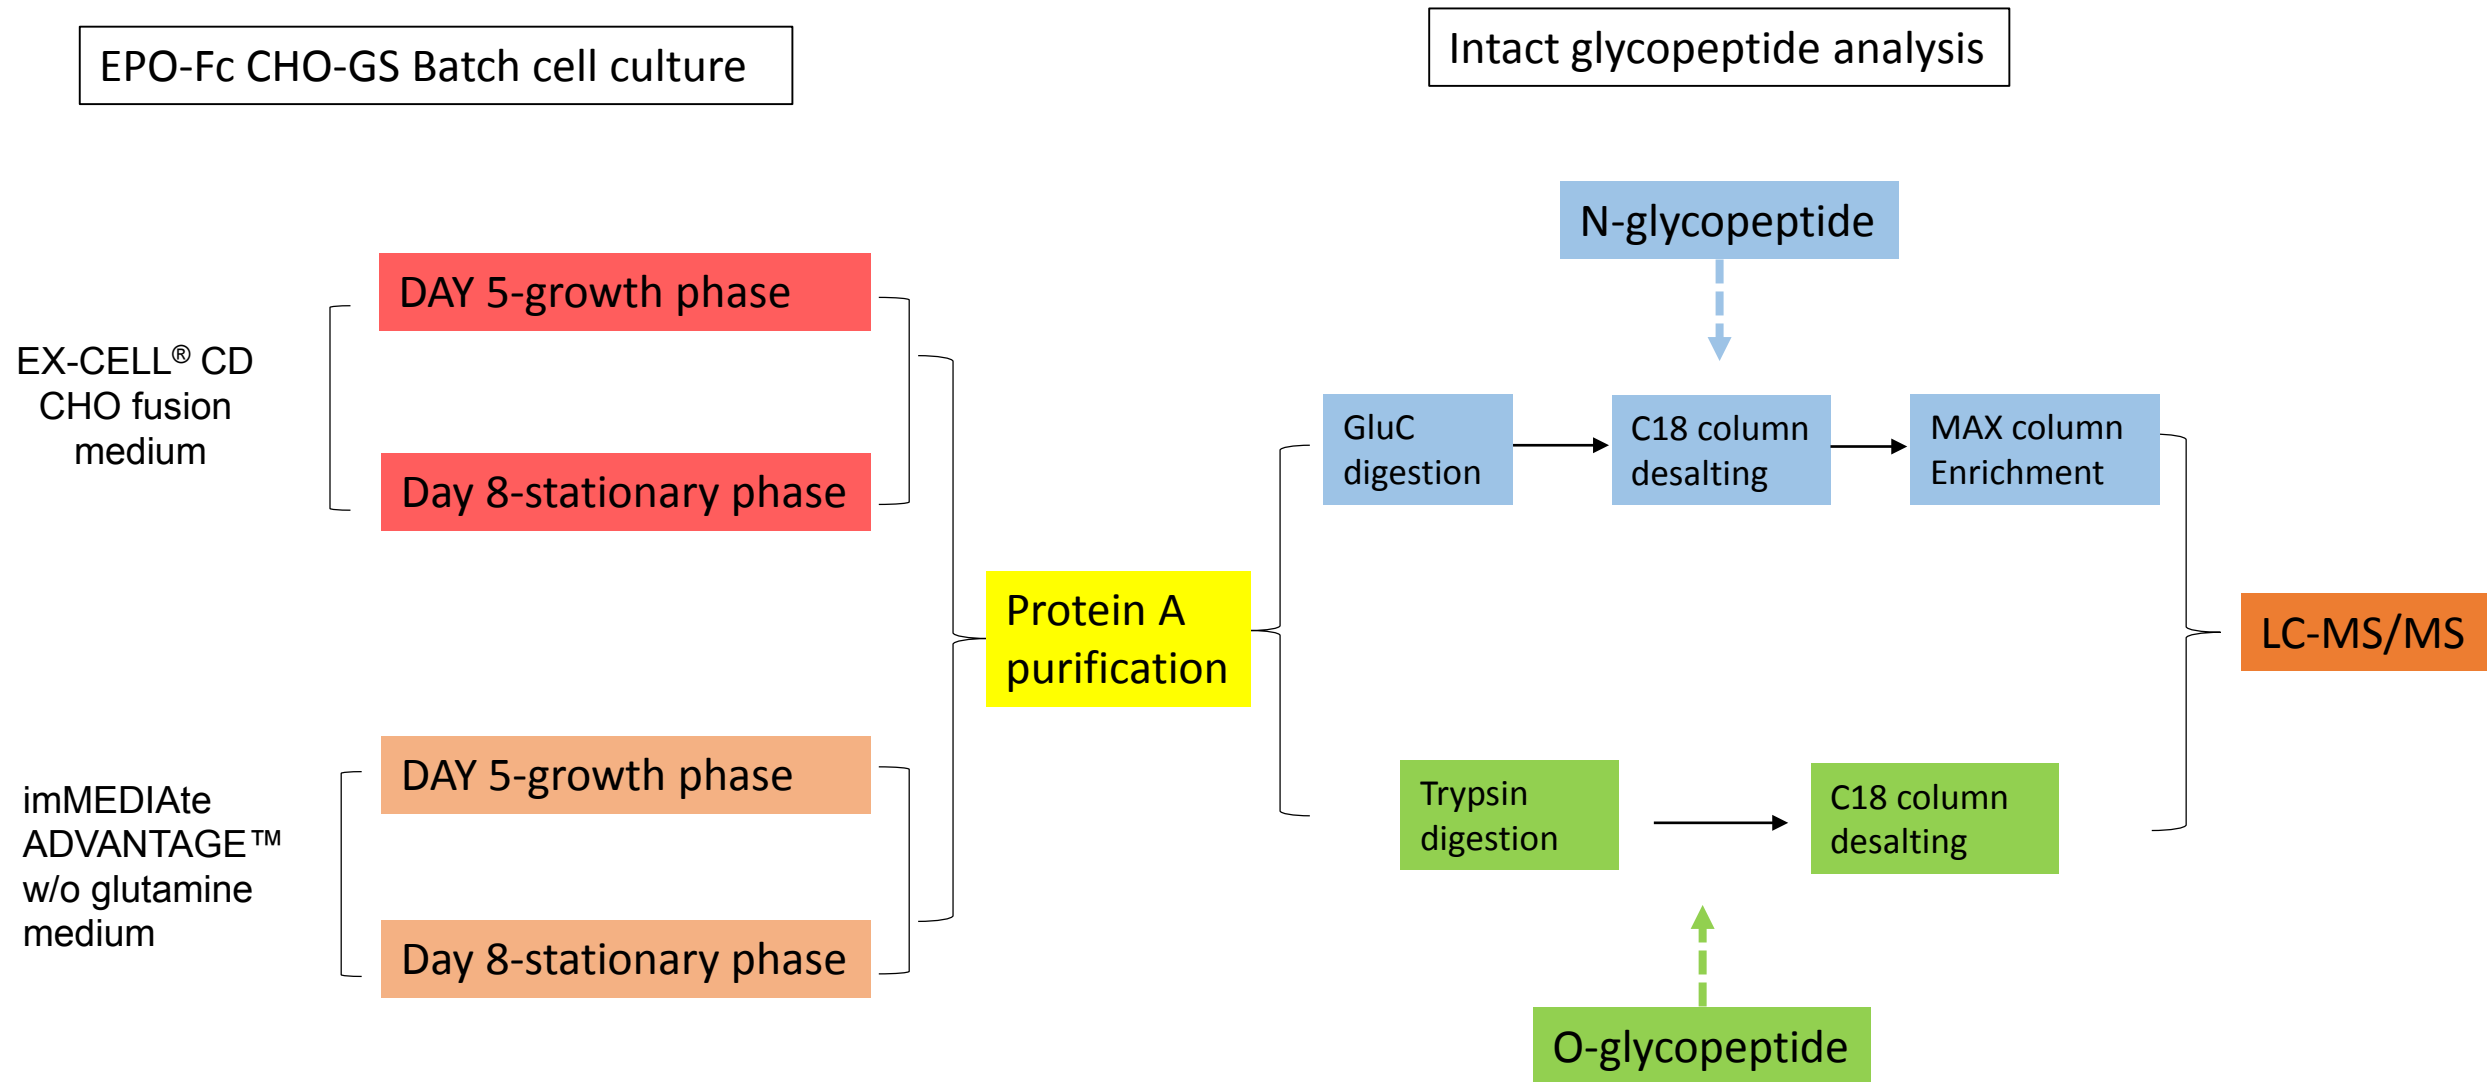

Supplemental Figure 1. The workflow of experiments in this work.

Supplemental Figure 2

2A

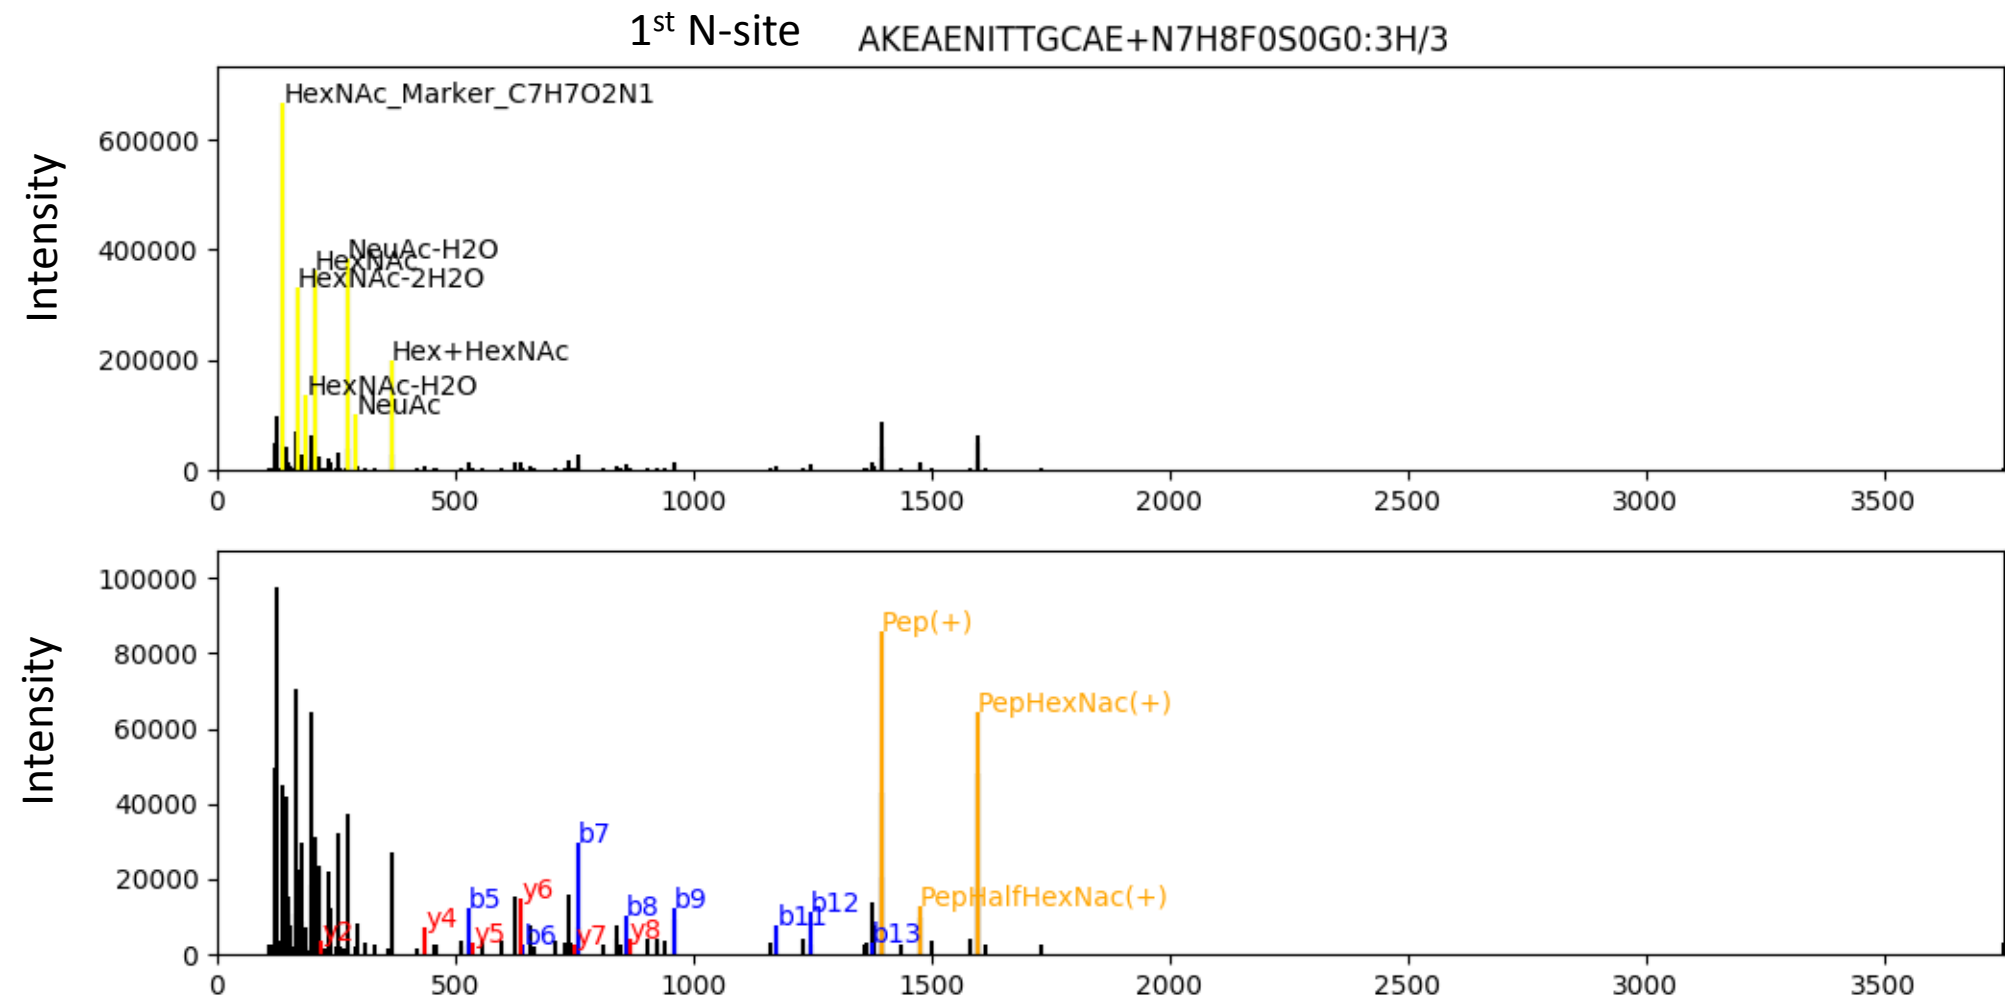

Supplemental Figure 2. Representative MS/MS spectra of the identified N- and O-glycopeptides in EPO-Fc protein. For example, in Figure 2A, Spectral title: AKEAENITTGCAE + N4H5F3S0G0/3. Glycopeptide sequence: AKEAENITTGCAE; N-glycan: N4H5F3S0G0 (N: HexNAc, H: Hex, F: Fuc, S: Neu5Ac, G: Neu5Gc); Charge: 3. The same labeling works for For (2B)-(2E). Upper figure: highlight only oxonium ions in yellow; Lower figure: after removing oxonium ions, highlights b-, y-, peptide- and peptide-glycan(Y1) fragment ions.

## Supplemental Figure 2

2B

2<sup>nd</sup> N-site HC SLNENITVPDTKVN FYAWKRME+N5H6F1S2G0:5H/5

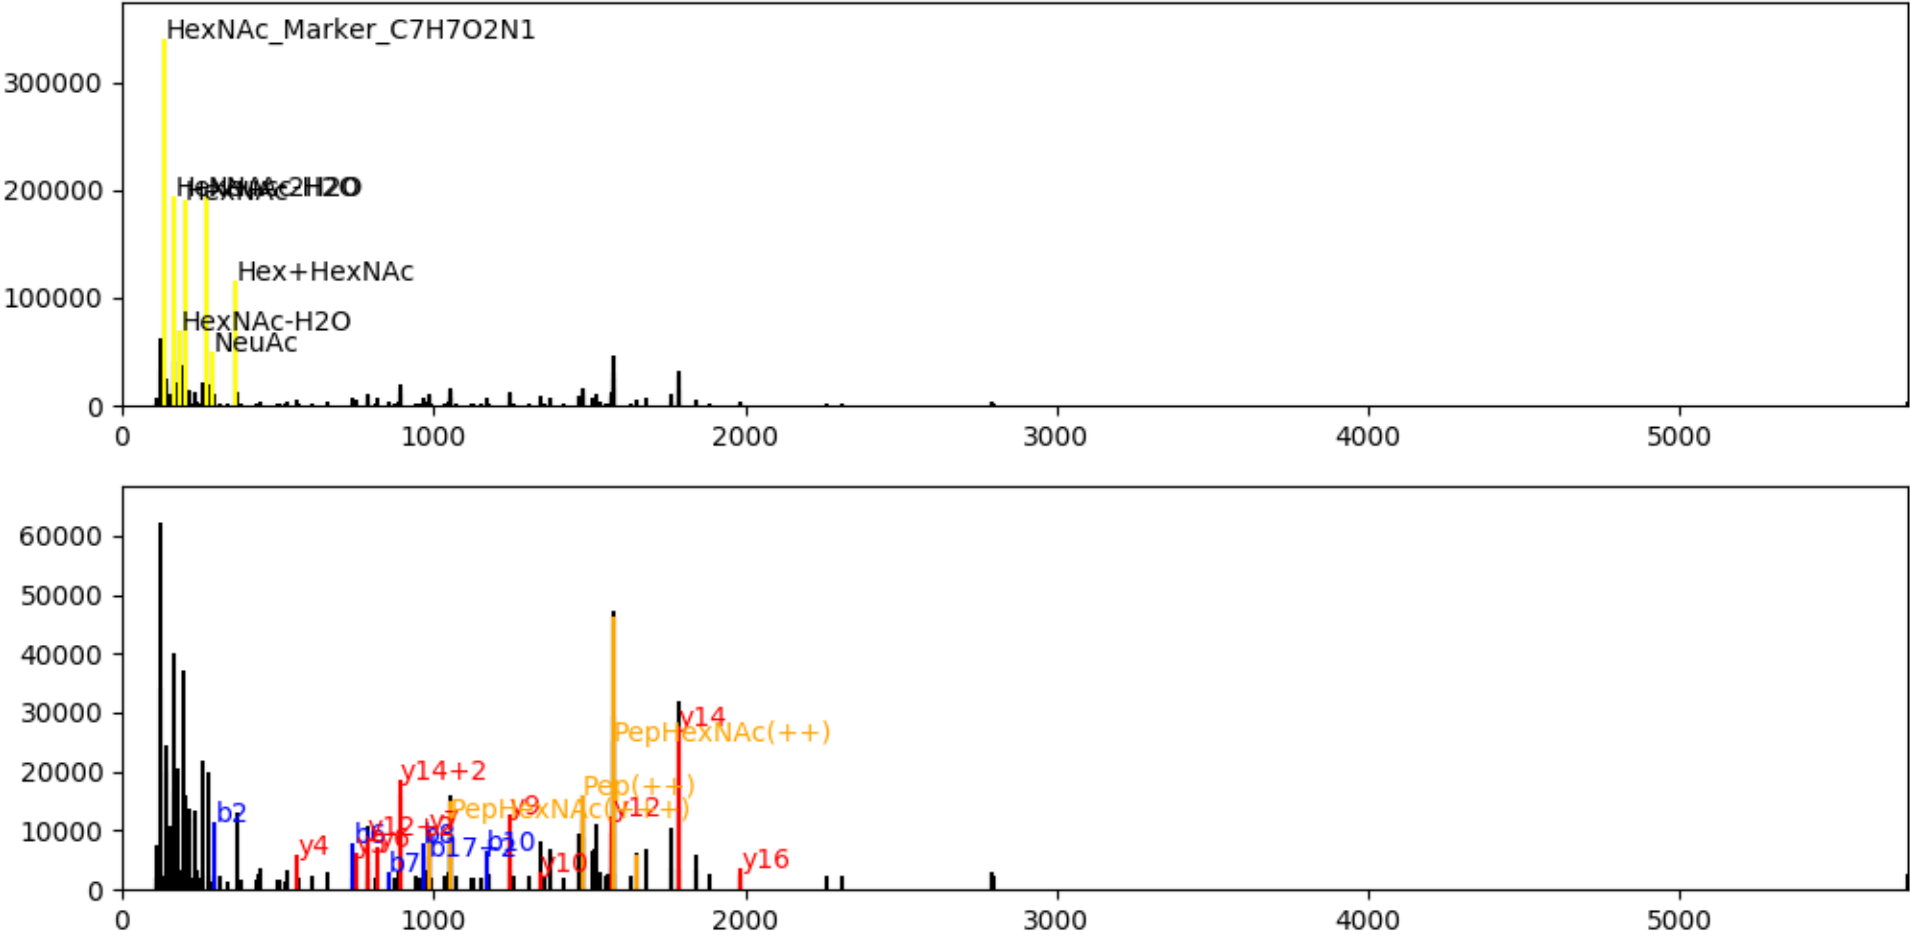

2C

3<sup>rd</sup> N-site

AVLRGQALLVNSSQPWEPLQLHVDKAVSGLRSLTTLRLALGAQKE+N8H8F0S0G0:7H/7

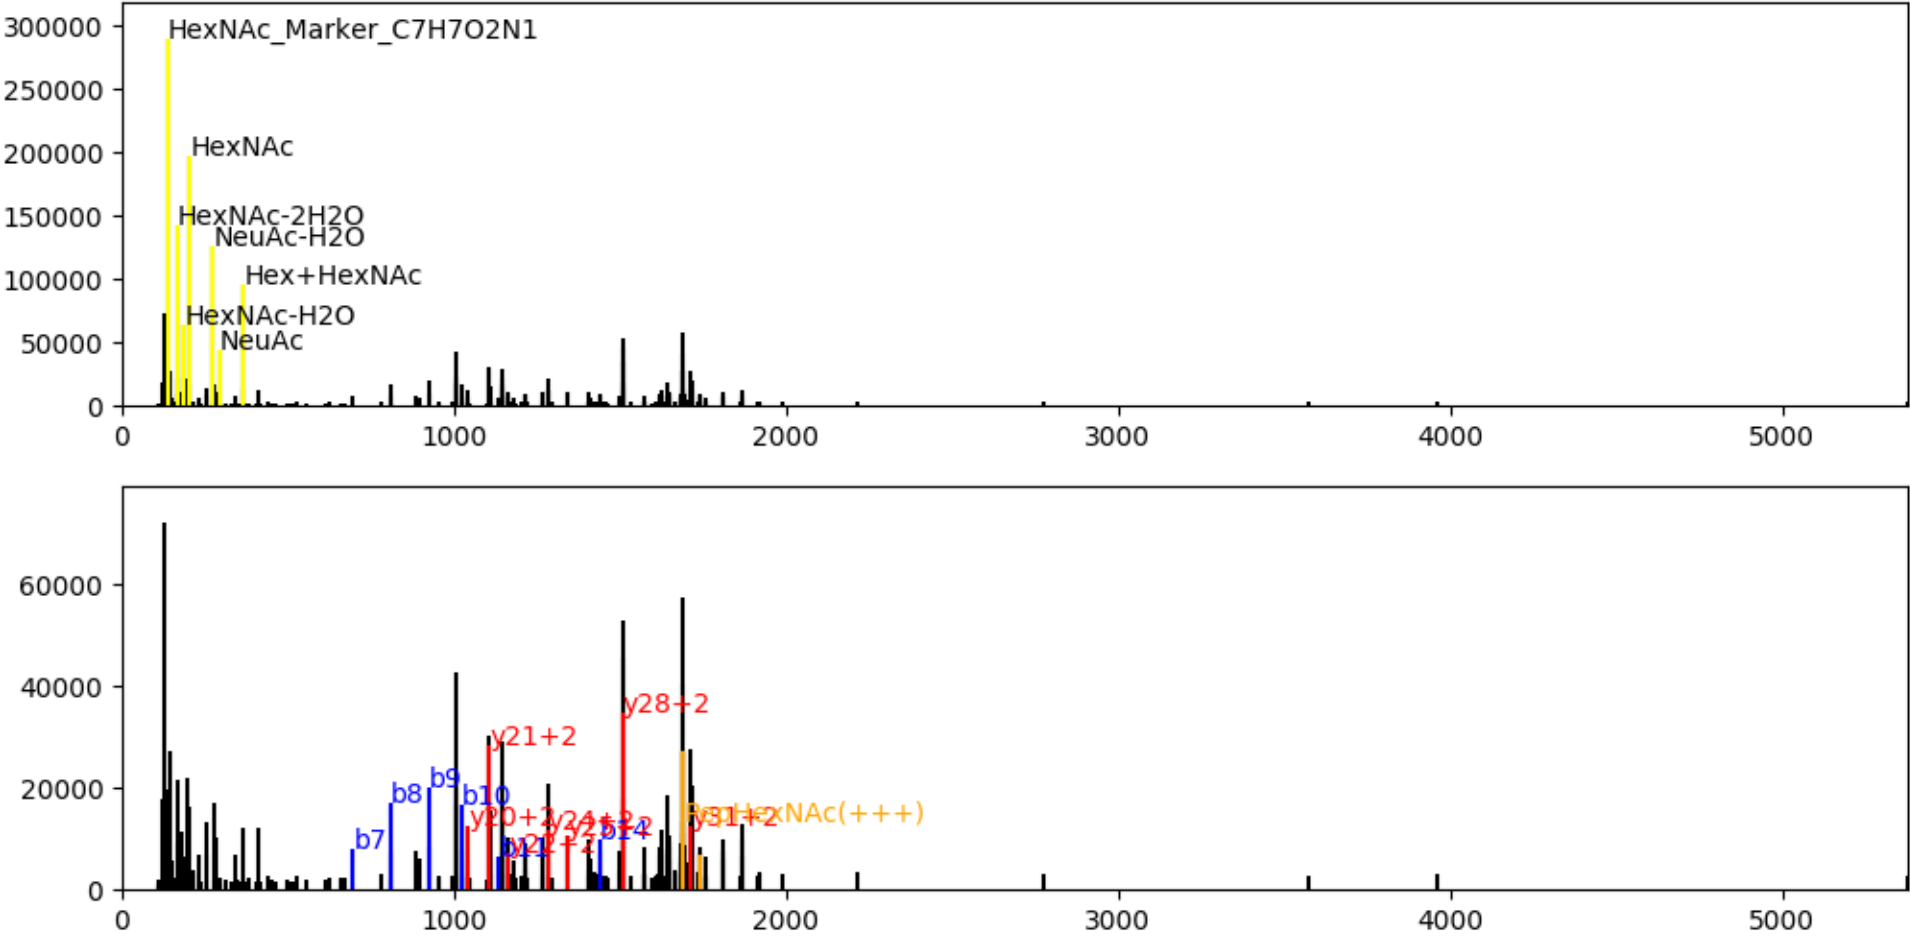

2D

4<sup>th</sup> N-site QYNSTYRVVSVLTVLHQDWLNGKE+N4H3F1S0G0:4H/4

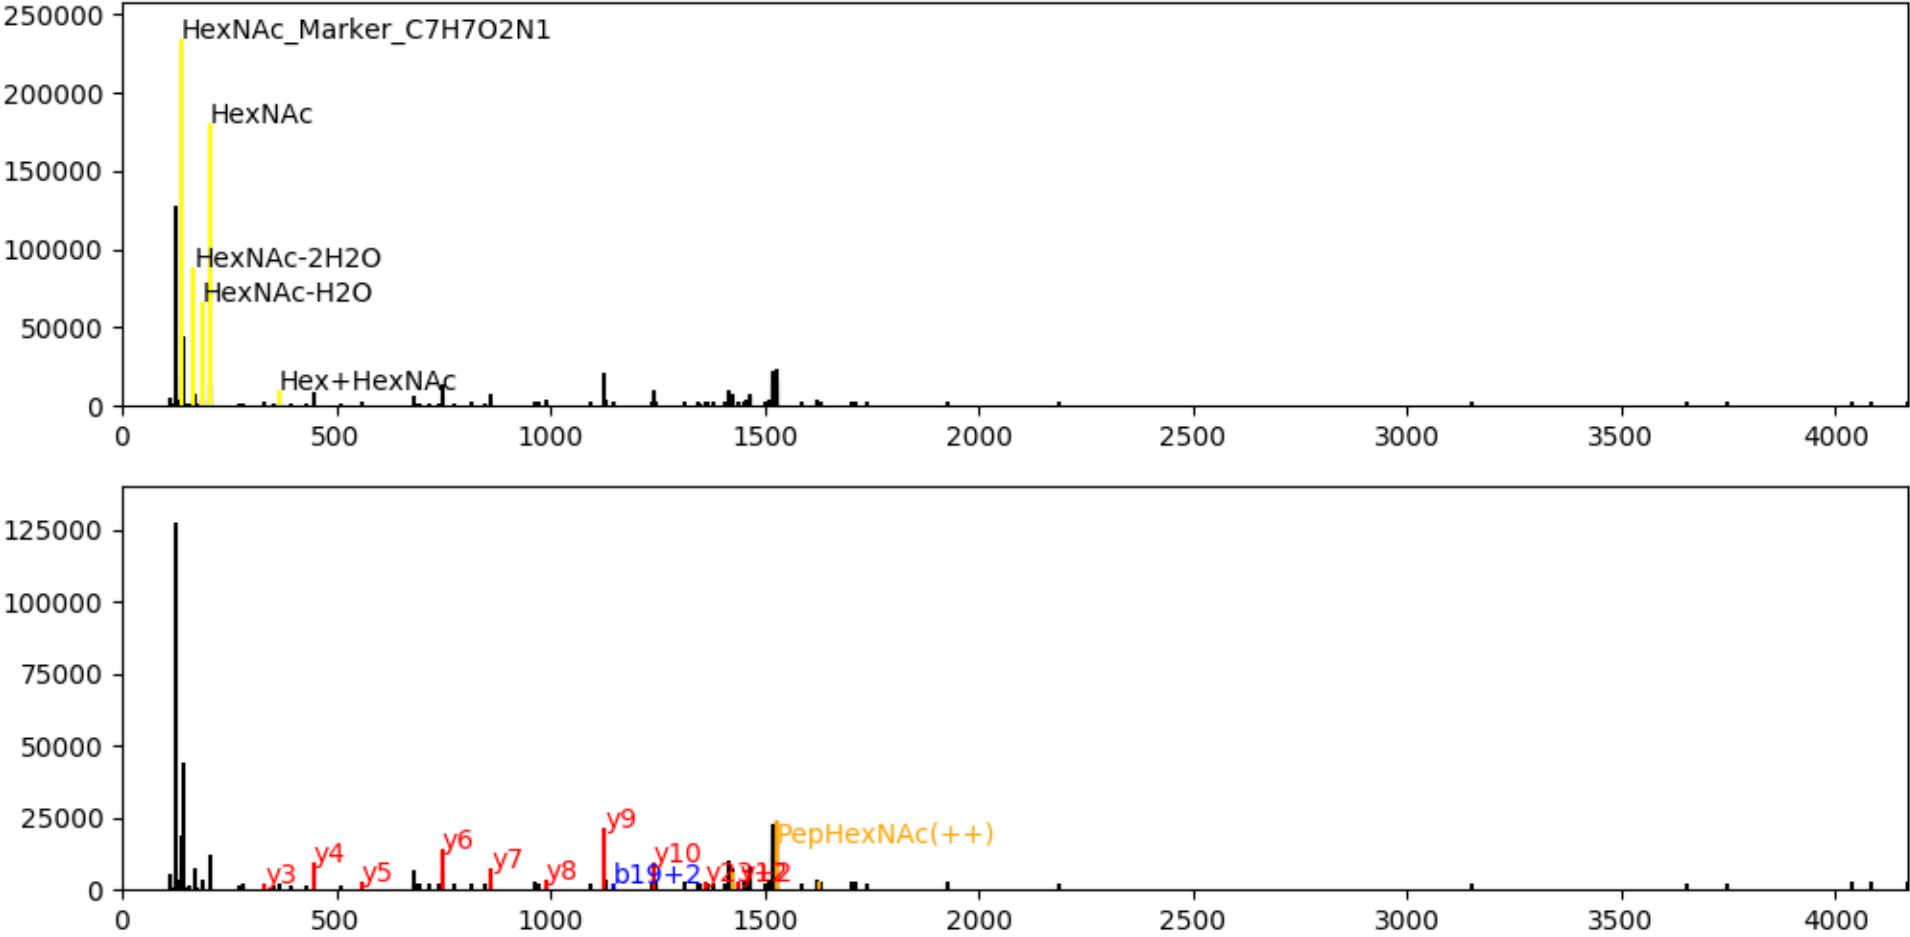

2E

O-site EAISPPDAASAAPLR+ N1H1F0S2G0:2H

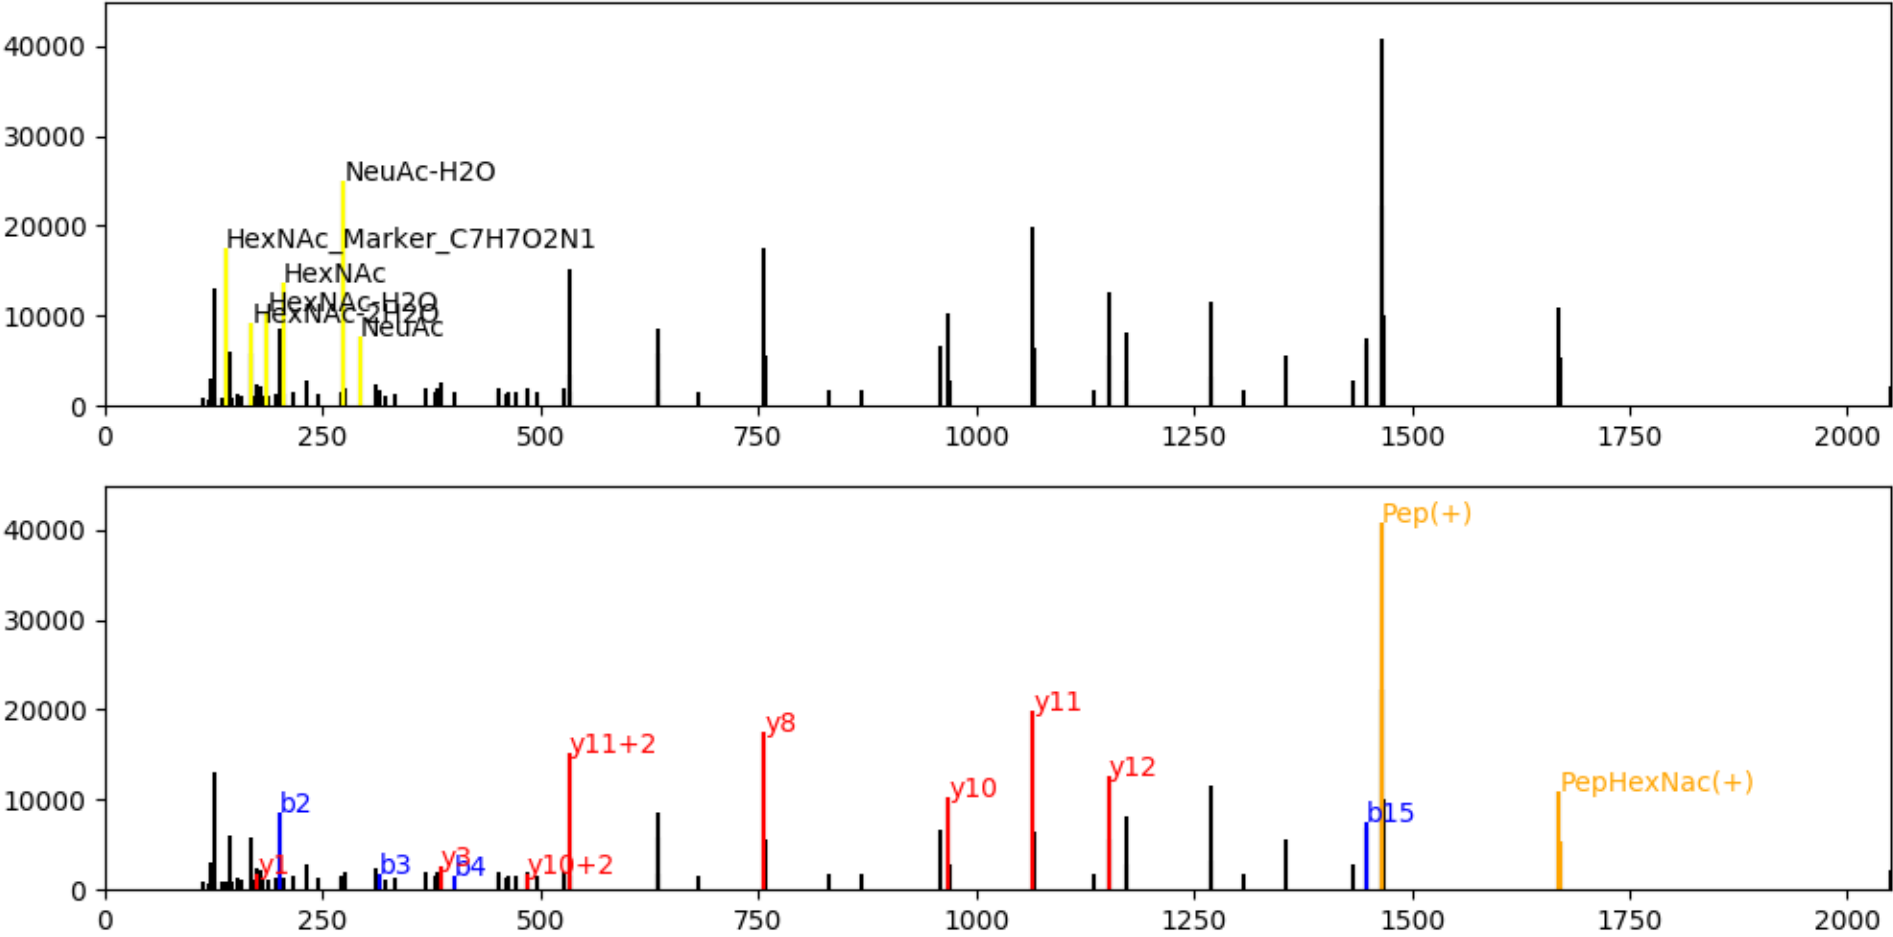

2F

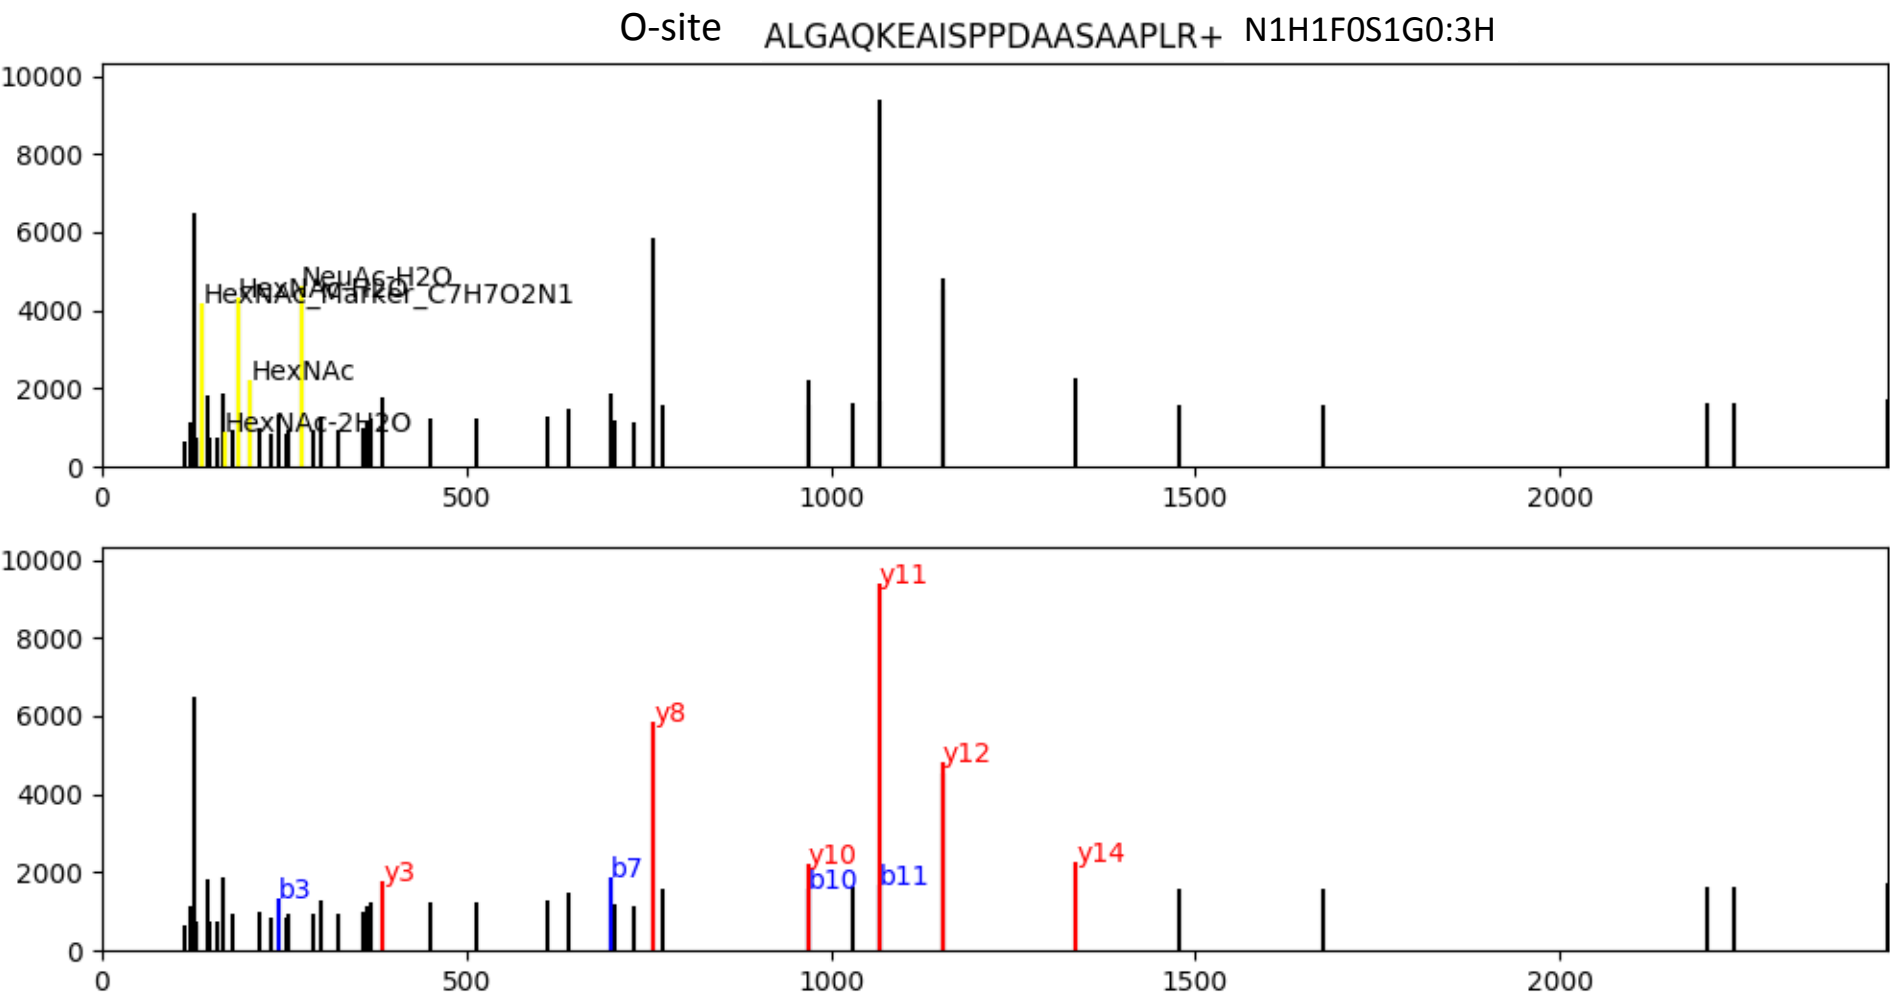

Supplemental Figure 3

3A

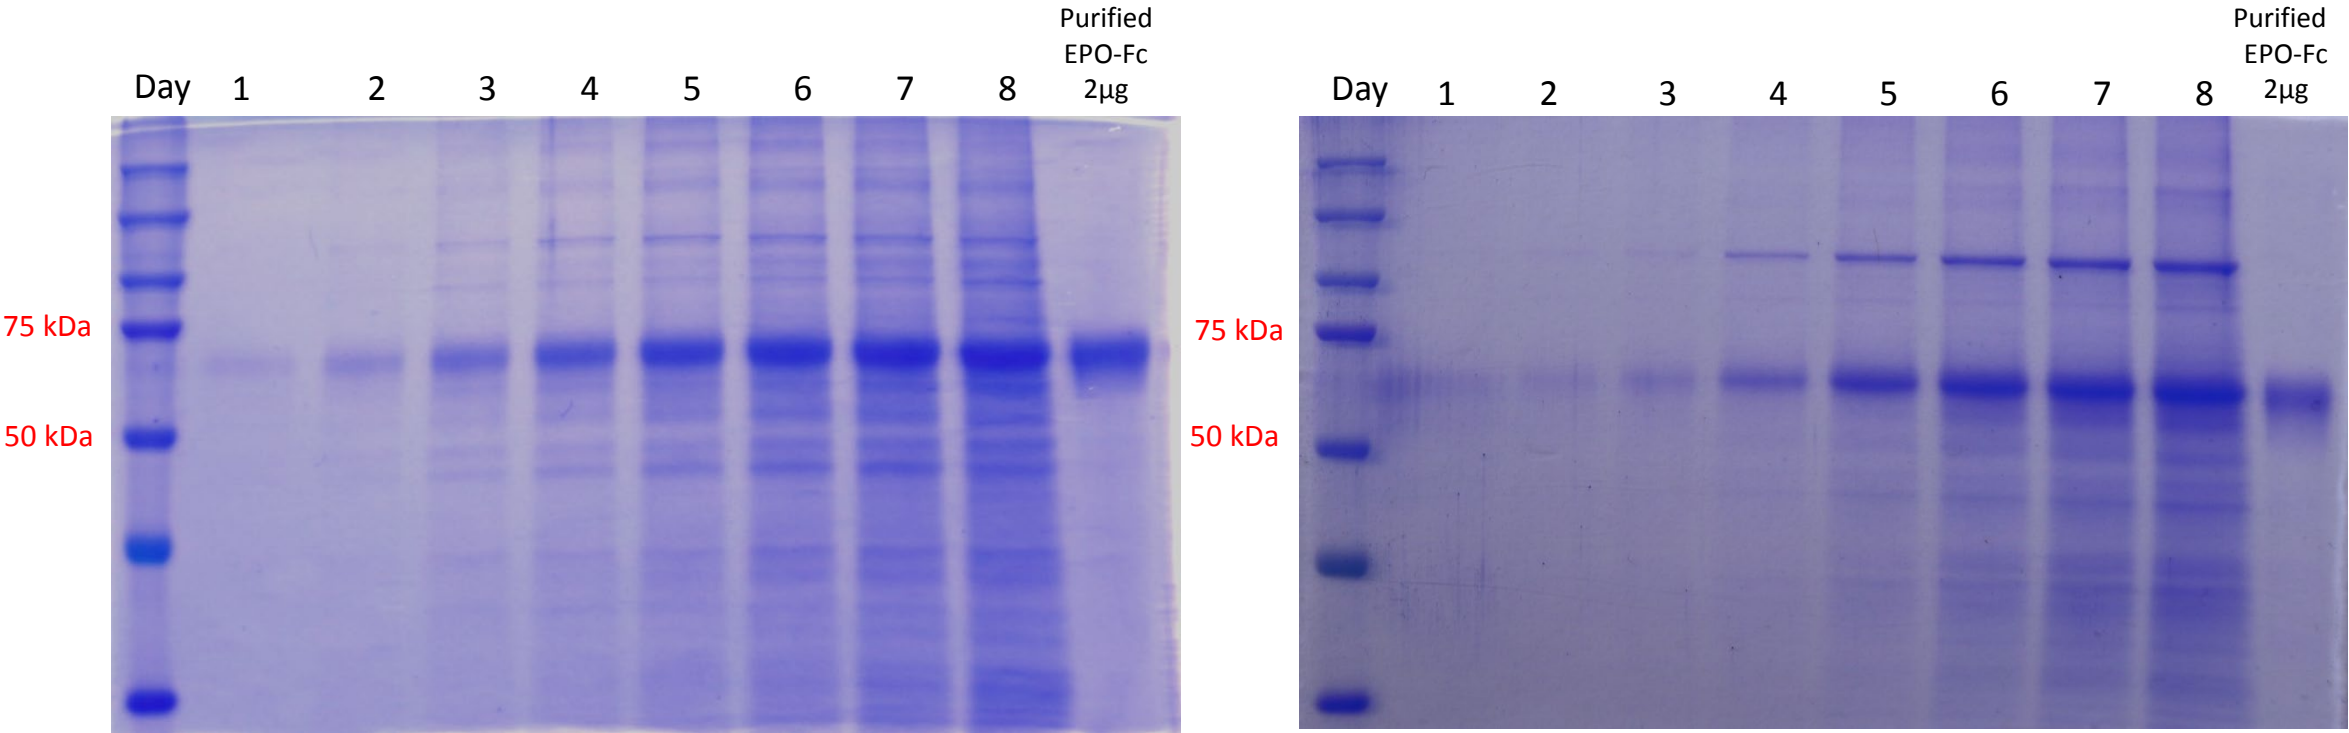

**EX-CELL medium**

**imMEDIATE medium**

Supplemental Figure 3. (3A) The abundance of EPO-Fc protein in the supernatant per day in the growth study. 40μl supernatant sample was loaded each well. 2μg purified EPO-Fc protein from EX-CELL medium on Day 6 cell culture were collected and used as positive control. (3B) Anti-EPO and Anti-IgG immunoblots for detection of EPO-Fc protein in the daily supernatant in the EX-CELL and imMEDIATE media growth studies individually. 15μl supernatant was loaded each well. 500 ng purified EPO-Fc protein from EX-CELL medium on Day 6 cell culture were collected and used as positive control.

Supplemental Figure 3

3B

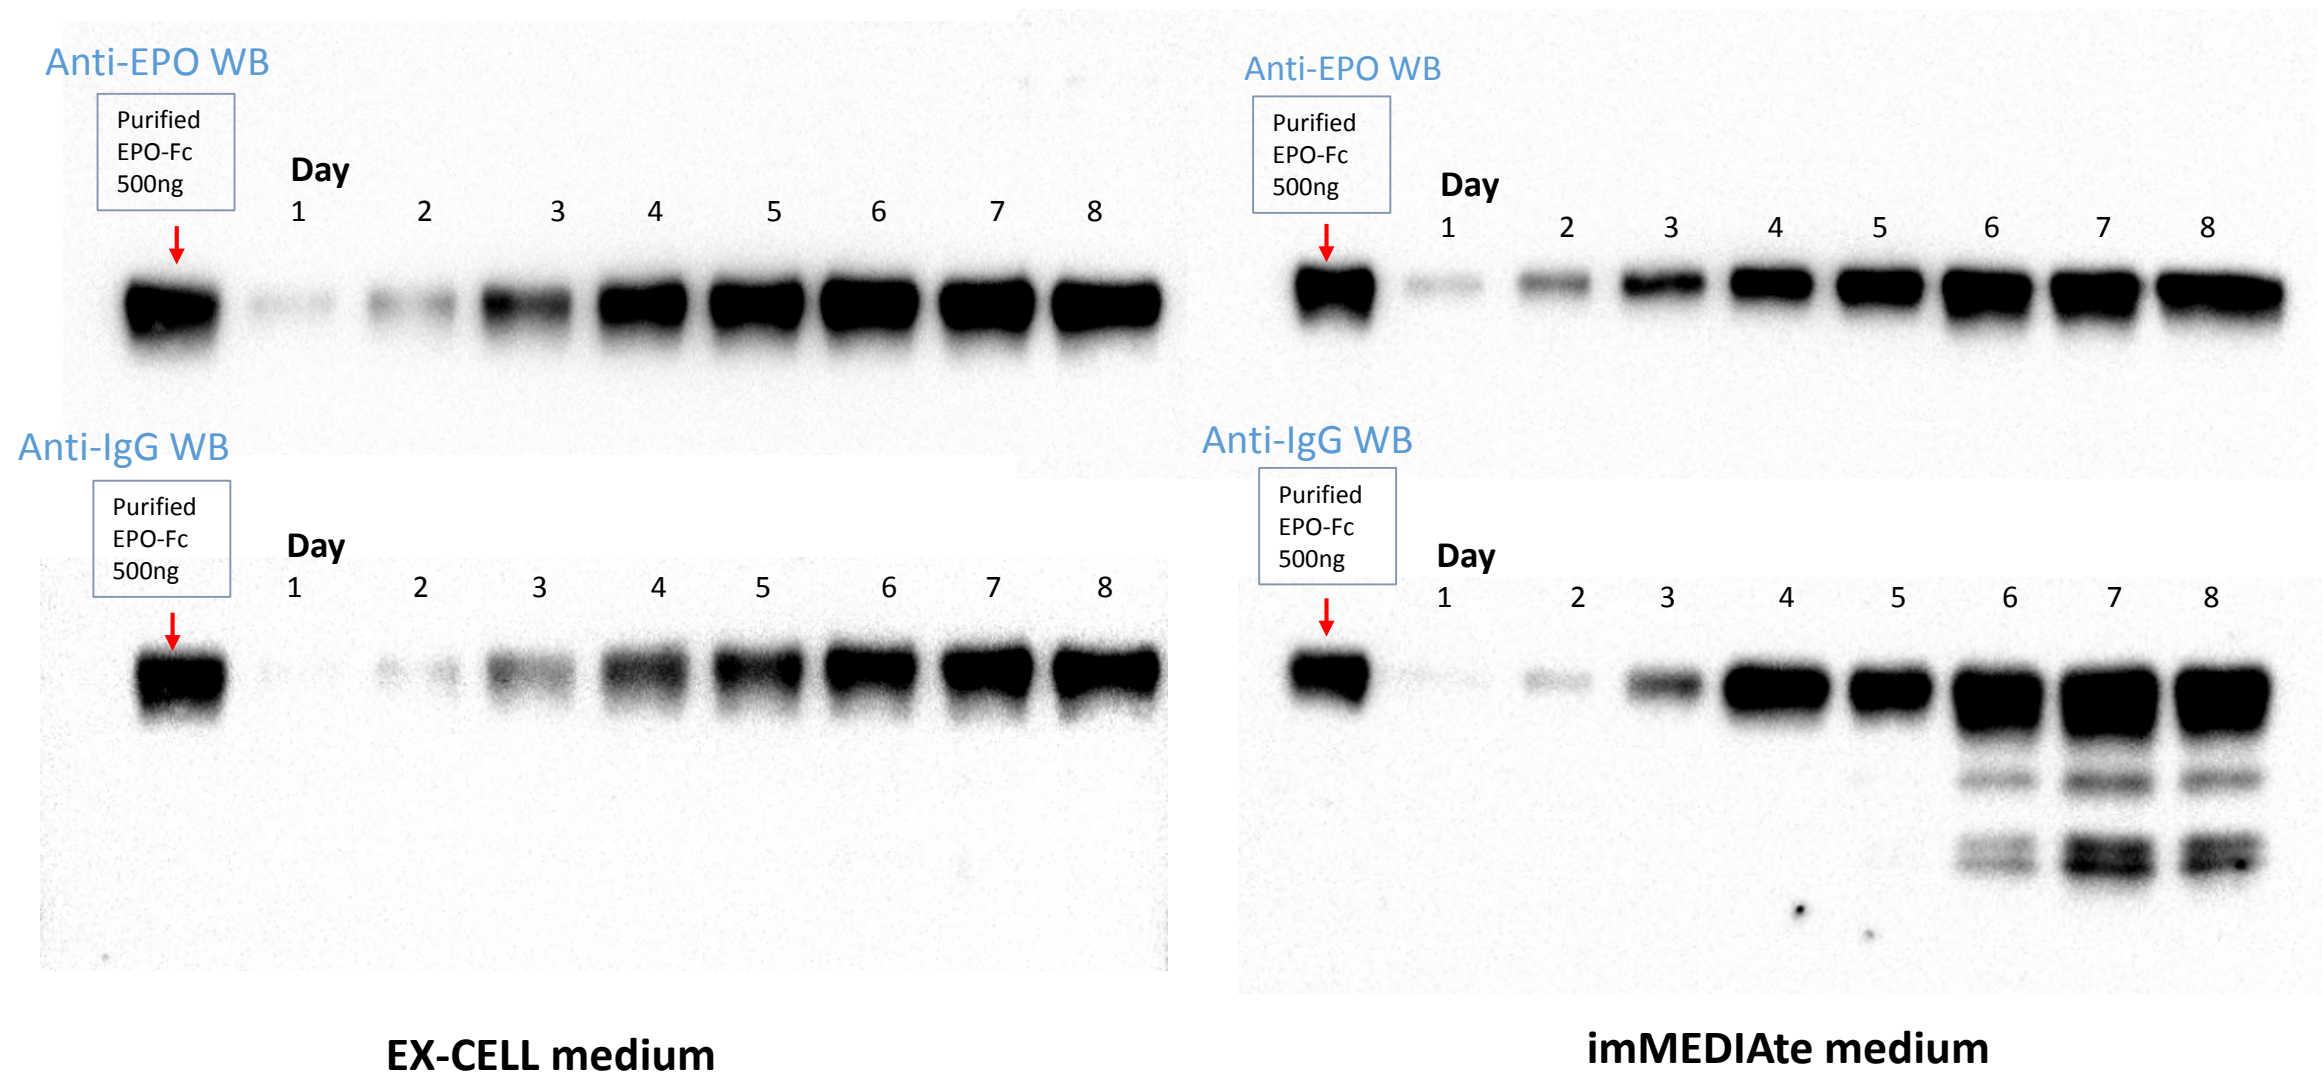

Supplemental Figure 4

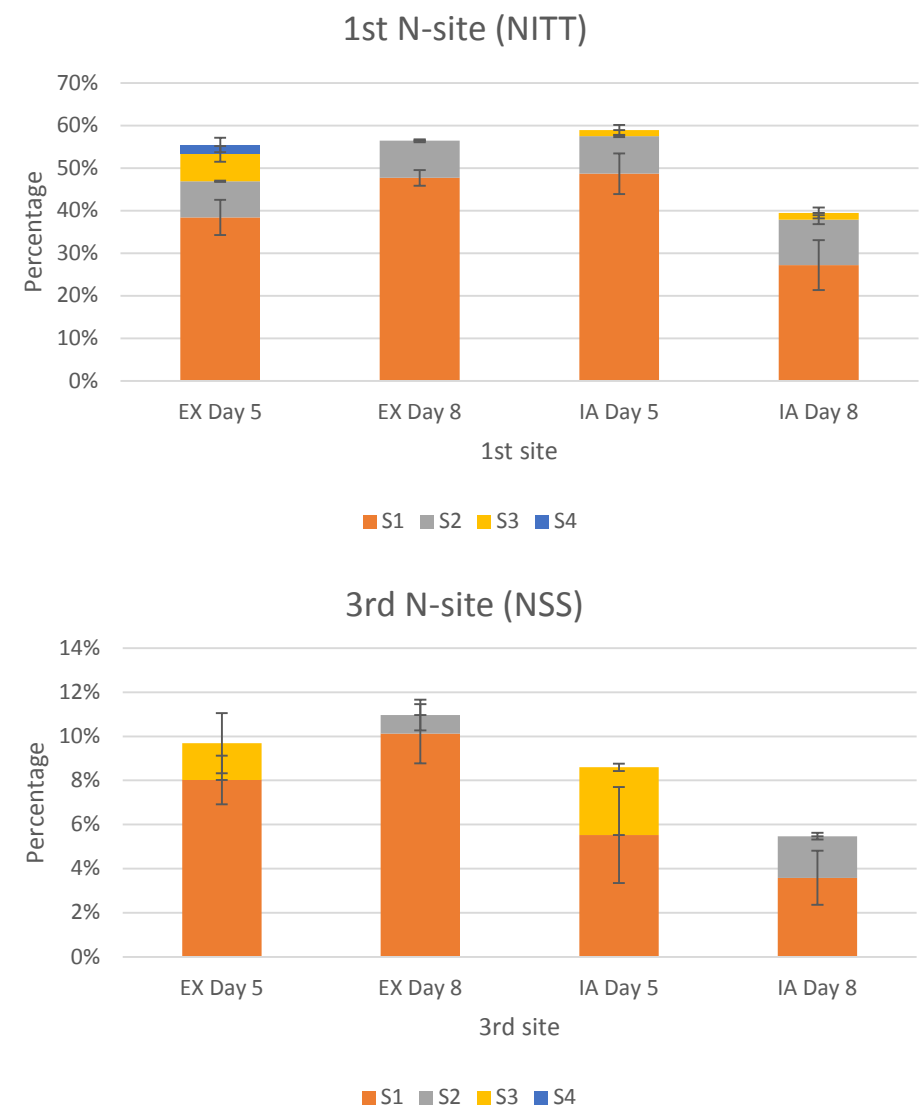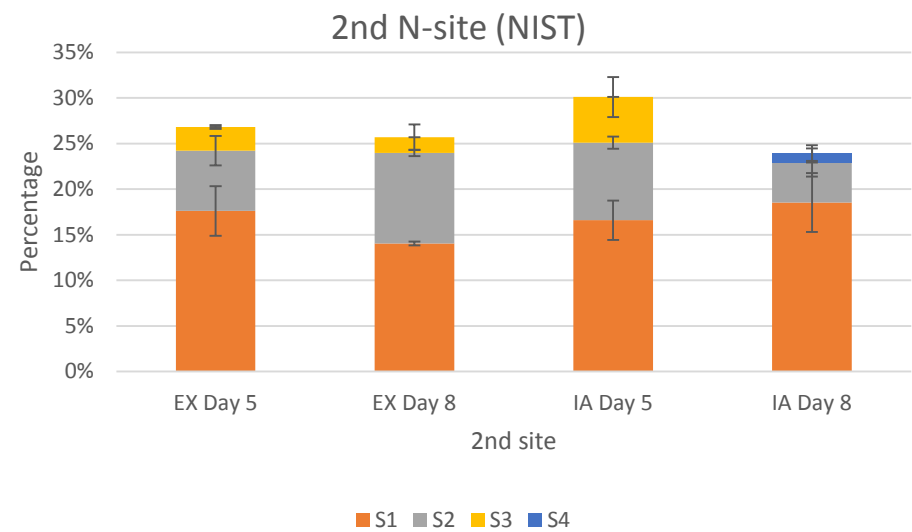

Supplemental Figure S4, The site-specific Neu5Ac sialylation distribution of EPO-Fc protein. S1: glycans with one sialic acid, S2: glycans with two sialic acids, S3: glycans with three sialic acids, S4: glycans with 4 sialic acids. NITT, NIST and NSS are the amino acids at 1<sup>st</sup>, 2<sup>nd</sup>, and 3<sup>rd</sup> N-glycan sites. At the 4<sup>th</sup> N-glycan site (Fc N-site), no sialylation has been detected.

Supplemental Figure 5

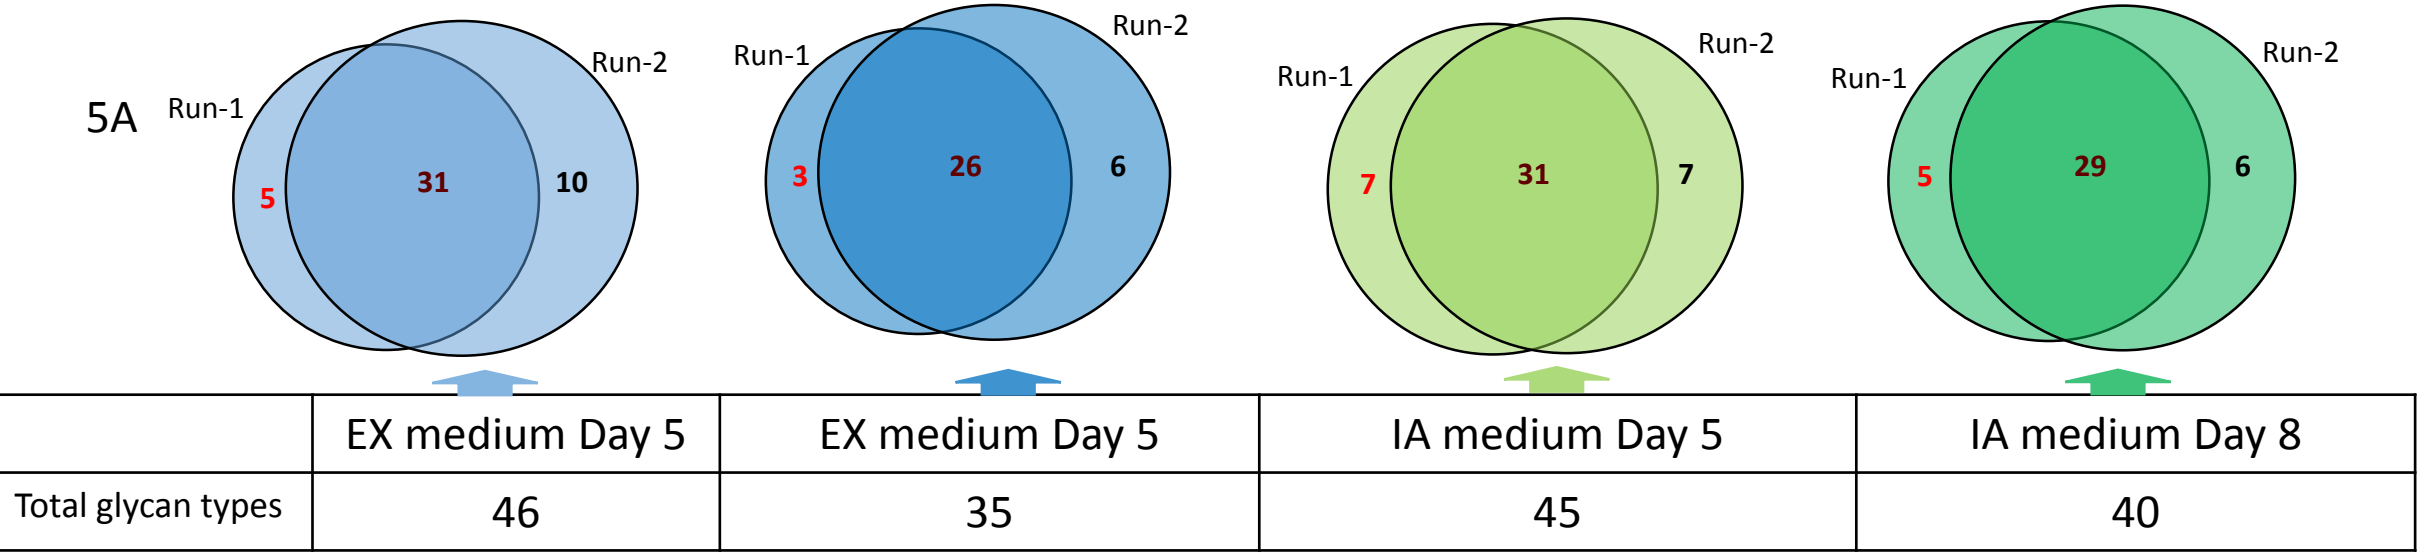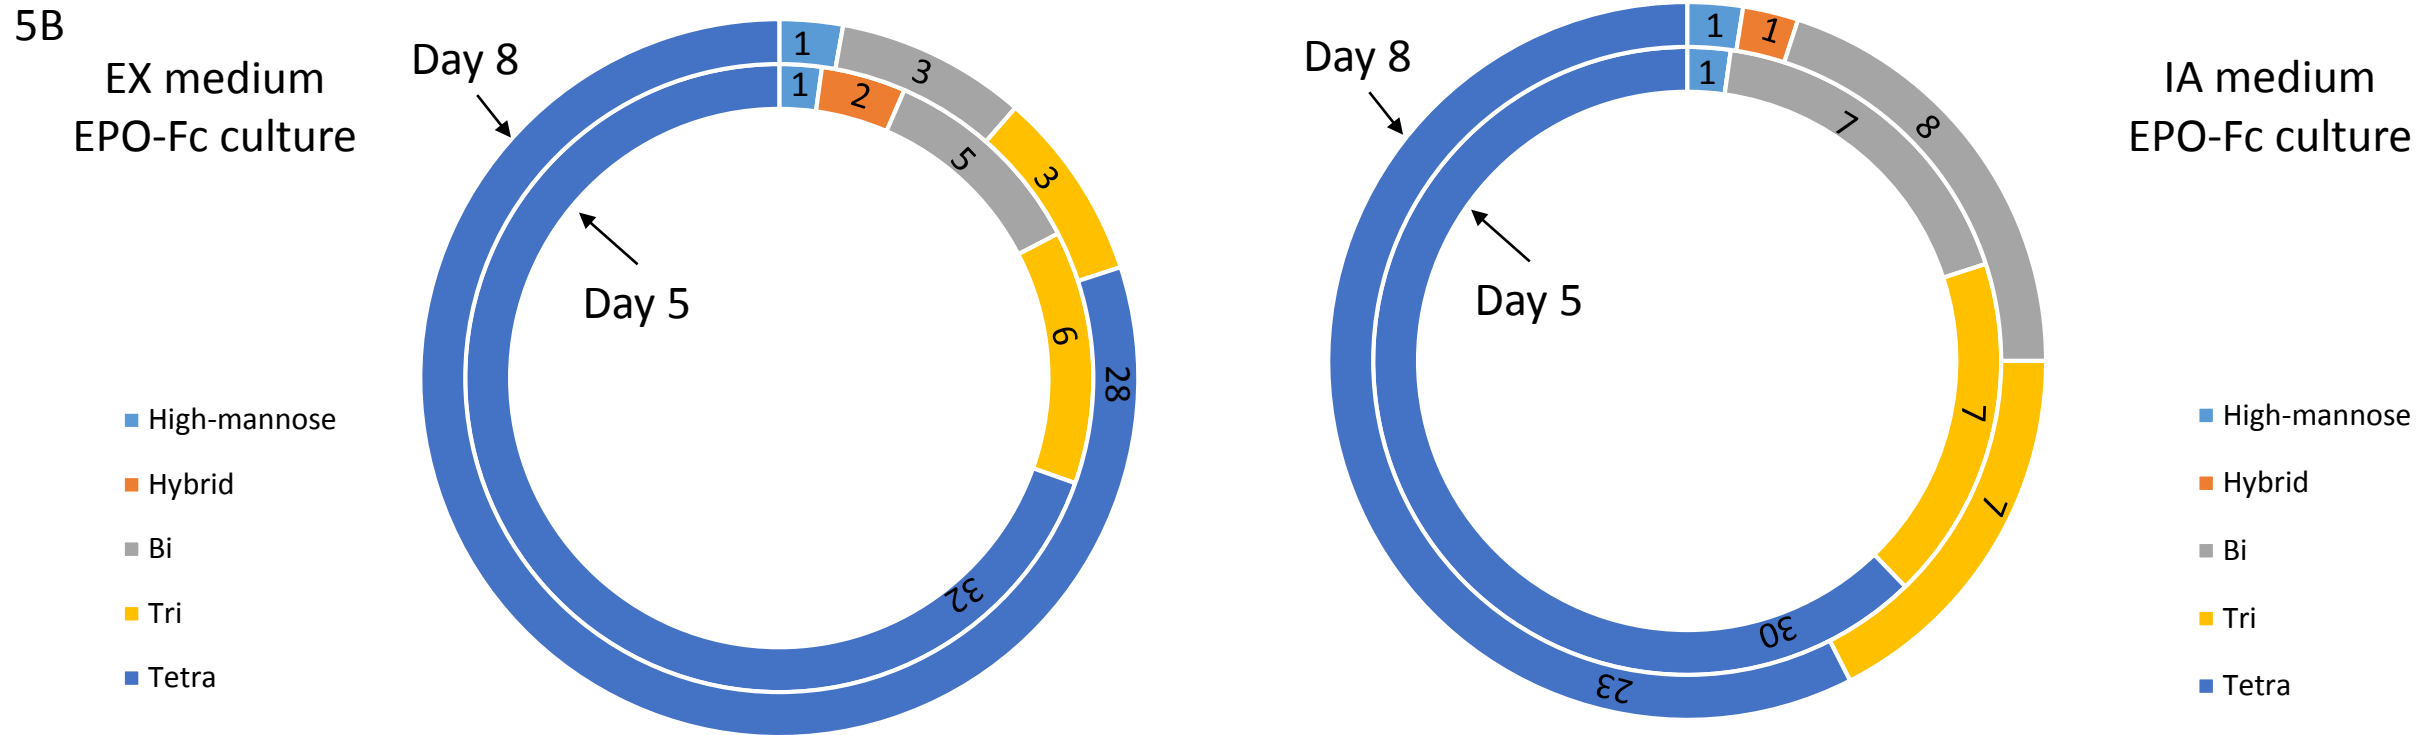

Supplemental Figure S5, The N-glycan types analysis of EPO-Fc protein using intact glycopeptide characterization. (S5A). The number of N-glycan types identified from each sample. The total glycan types were summarized from two biological runs. (S5B) The branch distribution of glycan types of EPO-Fc protein cultured in EX and IA media harvested at growth (Day 5) and stationary (Day 8) phases.
